# Supplementary material for: Perspectives on shared decision making related to medications from patients with multiple long- term conditions transitioning from hospital to home: a qualitative study
Source: Research Square preprint supplement (doi:10.21203/rs.3.rs-7486247/v1), 2025-09-12
Supplement: Supplementary file 3 [file e82fb4b90acea38c236d0840.docx]

**Co-design of a seamless person-centered intervention to optimize medication use across healthcare levels**

| Protocol version no. 5 – 05-05-2025 |
| --- |

## **Project participants**

**PhD-student and responsible study pharmacist:** Malin O. Syversen **Project leader and supervisor:** Liv Mathiesen, associate professor, Department of Pharmacy, University of Oslo, main supervisor

**Research responsible:** Head of department Kathrin Bjerknes, Department of Pharmacy, University of Oslo **Data processing responsibility:** Department of Pharmacy, University of Oslo **Other project staff and collaborators:**

- Marianne Lea, postdoc and clinical pharmacist, Hospital Pharmacies Enterprise, South-Eastern Norway and Department of Pharmacy, University of Oslo, co-supervisor
- Karin Svensberg, PhD, lecturer, pharmacist, Uppsala University, co-supervisor
- Torgeir Bruun Wyller, professor of geriatrics, Oslo University Hospital
- Torunn Wibe, PhD, nurse, professional consultant at Development center for nursing homes and home services in Oslo municipality
- Kristine Horgen, master student in pharmacy
- Steffi Benny, master student in pharmacy
- Beate Garcia, associate professor in clinical pharmacy, University of Tromsø
- Kirsten K. Viktil, clinical pharmacist and amanuensis-II, Diakonhjemmet Hospital Pharmacies and Department of Pharmacy, University of Oslo
- Stine Eidhammer Rognan, clinical pharmacist and PhD-student, Hospital Pharmacies Enterprise, South-Eastern Norway
- Mikas Glatkauskas, PhD-student, Department of Pharmacy, University of Oslo, study pharmacist
- Michael Scott, professor, Director of the Medicines Optimisation Innovation Centre, Northern Ireland
- Yvonne Andersson, Head of research, Hospital Pharmacies Enterprise, South-Eastern Norway, Oslo, Norway
- Anne Mette Njaastad, senior physician, Internal Medicine Ward, Oslo University Hospital
- Berit Gallefoss Denstad, users representative
- Monica Hauge, master student, Department of Pharmacy, University of Oslo
- Sandra Johanne Sedeniussen, master student, Department of Pharmacy, University of Oslo

## **Summary**

Multiple long term conditions entails various needs for complex medication treatment, which is a huge clinical challenge considering medication interactions and disease-medication interactions. It might affect quality of life, increase medical costs and needs, and cause patients to live several years with disabilities and reduced functional level (1, 2). Multiple long term conditions is an important public health problem, since it is increasingly more common as the population is getting older (1, 3).

It is well documented that communication problems exist between sectors in the healthcare system and that it creates an area of risk (4). There are many transfers that could be associated with risk for errors, as when patients are discharged from the hospital and is being transferred to the next level of care (5). When patients are discharged from the hospital, there is a need for transfer of correct information regarding medications (5). Transition of care leads to risk for medication discrepancies for the patients (6). Medication discrepancies are common within primary care and studies show that up to 90% of patients have at least one medication discrepancy in their lists (7-9). Different interventions have been tested to reduce medication discrepancies, but they do not eliminate the need for medication reconciliations (8, 10).

Higher patient satisfaction have been associated with improved patient safety, clinical effectiveness, health outcomes, adherence and lower resource utilization (11). According to Norwegian legislation, patients or users have a right to participate in the implementation of healthcare services, e.g. the choice between available and justifiable forms of service, examination methods and treatment methods (12). Person-centered care (PCC) is a concept that shifts the focus away from the traditional biomedical model to personal choice by applying shared decision-making (13). PCC reduce symptom burden, enhance patient activation, reduce readmission rates and improve quality of life (14).

Obtaining knowledge about medication discrepancies and perceptions from patients, next of kin and healthcare personnel (HCP) after the patient’s hospital discharge could contribute to a better success rate for future interventions and services. It is therefore of interest to investigate which factors that are of importance for a successful seamless person-centered intervention to optimize medication use across healthcare levels. To obtain knowledge about medication discrepancies and perceptions, the study will include both quantitative and qualitative methods, and be using a design thinking framework. The persons included will represent a wide selection with respect to, among other things, age, gender, education level, profession and diagnoses. The patients, next of kin and HCP will be included after written, informed consent.

## **Content**

[Project participants 2](#_Toc92702703)

[Summary 3](#_Toc92702704)

[Content 4](#_Toc92702705)

[Abbreviations 4](#_Toc92702706)

[Introduction 5](#_Toc92702707)

[Problem statement – aim 7](#_Toc92702708)

[Methods 8](#_Toc92702709)

[Study procedures 10](#_Toc92702710)

[Ethics 18](#_Toc92702711)

[Project timeline 20](#_Toc92702712)

[Budget 20](#_Toc92702713)

[References 20](#_Toc92702714)

[Attachments 23](#_Toc92702715)

## **Abbreviations**

ATC Anatomical Therapeutic Chemical
GP General practitioner
HCP Healthcare personnel
NSD Norwegian Center for Research Data
OUS Oslo University Hospital
PCC Person-centered care
REK Regional Committee for Medical and Health Ethics
TSD Services for sensitive data
UiO University of Oslo

## **Introduction**

*Patients with multiple long term conditions*Multiple long term conditions is defined as the presence of two or more diseases at the same time in one patient (3, 15). It represent a huge challenge for clinicians and patients, partly because most of the clinical studies has focused on specific diseases rather than the whole range of diseases (1, 3). Globally, one of three people is identified having multiple long term conditions (16). Multiple long term conditions might affect quality of life, increase medical costs and needs, and cause that patients live several years with disabilities and reduced functional level (1, 2). Multiple long term conditions is increasingly more common as the population is getting older (1, 3). The different diseases in a patient can interact with each other, potentiate each other’s negative effects and thereby give outcomes which is beyond what we can expect for the single conditions alone (2). Including patients with multiple long term conditions in research studies is crucial to be able to provide them optimal healthcare in the future.

*Transitions in the healthcare system*It is well documented that communication problems exist between sectors in the healthcare system (4). In Norway, this could be because sectors do not have a mutual medical record system or routines for transfer of information. The most important challenge is to ensure safe follow-up on medication treatment when patients changes level of care (17). There are many transfers that could be associated with risk for medication error, e.g. when patients are discharged from the hospital and is being transferred to the next level of care (5). There is a need to ensure transfer of correct information regarding medications to fulfill the intentions of the hospital physicians (5). At the same time, the communication of medication-related information in the discharge summary from secondary care to primary care has been shown to be problematic and requires improvement (18). Transition of care leads to risk for medication discrepancies for the patients (6).

*Medication discrepancies*Medication discrepancies can be defined as any differences between a medication list and which medication the patient actually uses (19). Medication discrepancies could occur at admission to the hospital, transfer between wards and at discharge from the hospital. Medication discrepancies can be duplication, omission, discontinued medication, incorrect schedule, wrong formula and/or wrong dose (6, 18, 20). Several studies have reported that medication discrepancies occur more commonly when patients are discharged from the hospital and that they can occur in as many as 41-70% of the patients (6, 20, 21). There is also reported a strong association between the number of discharge medications and the likelihood of medication discrepancies (6, 20, 21). Medication discrepancies are common within primary care and studies show that up to 90% of patients have at least one medication discrepancy in their lists (7-9). Medication reconciliation performed by pharmacists can be an effective way to resolve medication discrepancies and thereby improve medication quality, safety and efficacy (21, 22). Different interventions have been tested to reduce medication discrepancies, but they do not eliminate the need for medication reconciliations (8, 10).

*Person-centered care during transitions in the healthcare system*The term person-centered care (PCC) is used to describe the concept that shifts the focus away from the traditional biomedical model to personal choice by implementing shared decision-making through patient autonomy for people receiving health services (13). It includes the person’s preferences, values and beliefs that is appropriate and meaningful for the individual (23). In doing so, it also incorporates illness understanding, illness experience and information needs into the process of decision-making (14). It is shown that PCC can reduce symptom burden, enhance person activation, reduce readmission rates and improve quality of life (14). According to Norwegian legislation, patients or users have right to participate in the implementation of healthcare services, e.g. the choice between available and justifiable forms of service, examination methods and treatment methods (12). This leads to informed, active and prepared persons, rather than passive recipients. PCC encourages person involvement and recognizes the person as a whole person rather than merely experiencing a disease process (24).

Self-efficacy, defined as the patient’s conviction that one can successfully execute the behavior required is strongly correlated to empowerment (25, 26). Patients has shown to be effective and willing contributors by supporting their own medication safety at transfers in the healthcare system (27). Fylan et al. demonstrated that patients are an important source for system resilience after discharge from hospital as they anticipate and identify medication errors, conduct preventive and corrective actions to avoid harm, and contributes to information management at different points (27). Patients often experience vulnerability in medication management when transferred from the secondary healthcare to the primary healthcare, but patients can improve the system by developing strategies to reduce the risk of medication errors (27). The extent of medication errors seems to be an area with potential for improvement. Studies suggest that an extensive follow-up after discharge, based on previous hospital interventions, carried out by a pharmacist who has access to the patients earlier disease history, increase the efficacy of the intervention (28). It is suggested that medication reconciliation, medication review and post-discharge interventions should be performed all together as an integrated part of a multi-faceted program for better outcomes, and not isolated (29).

Our research group has previously completed the OPERA- (30) and PERLE-studies (31, 32), which explore the effect of a pharmacist intervention at the hospital and medication communication at hospital discharge from the patient perspective including the discharge process, respectively. The results from the PERLE-study gives a wider understanding of the discharge process and how patients experience medication communication at discharge. The results showed that every patient experienced a unique discharge process and that communication between healthcare personnel and patients was not sufficiently fostering patient empowerment and self-efficacy. The OPERA-study found no significant effect of the in hospital intervention on time to readmission or death within 12 months, but found a statistically significantly increased overall survival (30). The intervention in the OPERA-study consisted of clinical pharmacist added to the multidisciplinary treatment team working systematically according to the “Integrated Medicines Management” (33). IMM was originally developed in Northern Ireland (4, 34) and refined in Sweden (35). It is of importance to note that the model was used as without adaption to the Norwegian context and taking into account the traditional role for clinical pharmacists in Norwegian hospitals. This is especially related to the discharge process in which pharmacist would not normally be included.

Even though the OPERA-study showed statistically significant increased overall survival, is it desirable with a new intervention that fits better to the Norwegian context. Furthermore, a study suggest that medication reconciliation, medication review and post-discharge interventions should be performed all together as an integrated part of a multi-faceted program for better outcomes, and not isolated (29). This leads to a demand for a new intervention that extend beyond the hospital stay to achieve a seamless person-centered intervention to optimize medication use across healthcare levels. In designing the new intervention, we need to obtain more knowledge about how to inform intervention development, study design and planning with respect to the user’s needs (36). This is important since it is shown that patients are effective and willing contributors by supporting their own medication safety at transfers in the healthcare system (27). When developing a complex intervention, it is important to identify facilitators and barriers, e.g. to ensure that HCP involved in its delivery find it suitable and not in conflict with their daily tasks (36).

## **Problem statement – aim**

The aim of the project is to obtain knowledge about how we can strengthen patient’s self-efficacy and improve the information flow when it comes to medications, in the transition between the healthcare levels. To do so, we need to identify facilitators and barriers to achieve a seamless medication treatment based on the user’s needs. The results will form a basis for a new, improved intervention, which follow patients during the hospital stay and further out in the primary healthcare. The aim of this project is divided into the following parts:

- Investigate the frequency and type of medication discrepancies between the medication list in the discharge summary and medication use after hospital stay, to identify risk factors for which and why medication discrepancies occur in patients with multiple long term conditions.
- Map the perceptions of patients with multiple long term conditions and next of kin regarding medication use, shared decision-making and their opinions about previously published interventions to improve medication use.
- Evaluate HCP’s perceptions regarding elements in patients with multiple long term conditions care that works well, what they believe do not work, with particular emphasis on the treatment with medications and transfer of care. In addition, how this care could be improved especially with the new intervention in mind.
- Using design thinking framework to create prototypes for a new intervention

Overall hypothesis for the project: Knowledge about medication discrepancies and perceptions from patients, next of kin and HCP regarding barriers and facilitators for a seamless medication treatment can contribute to an improved efficacy and implementation of the new, improved intervention.

## **Methods**

This study will use a design thinking framework based on the Three I’s developed by IDEO (37): **I**nspiration, **I**deation and **I**mplementation. Inspiration focuses on learning how to better understand people to create possibilities, ideation focuses on making sense of that you have heard to identify opportunities for design and generate ideas, and implementation focuses on bringing your solutions to life to maximize its impact. This framework is a field guide to human-centered design as a way to apply design techniques to social service and innovation sectors, such as healthcare. This study will focus on the two first I’s, namely the inspiration and ideation phase, whereas the third I, the implementation phase, will be covered in future projects. Figure 1 shows all of the phases.

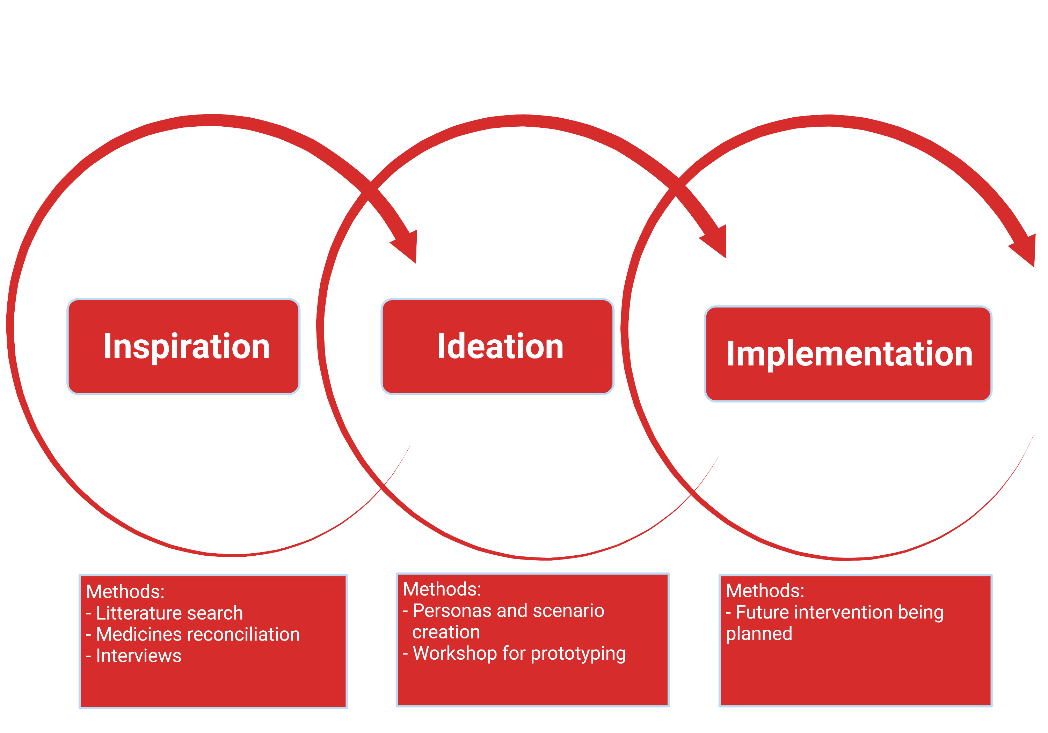


Figure 1: Design thinking framework based on the Three I’s by IDEO (37) . Inspired by Hahn-Goldberg S et al. (38). Created in Biorender.com.

The inspiration phase will comprise the following methods:

- Literature search to identify previously published models which might be suitable
- A quantitative part that assesses the number, type and clinical relevance of medication discrepancies after hospital discharge by medication reconciliation
- A qualitative part in the form of semi-structured interviews and field notes including patients, next of kin and HCP

We will focus on learning how to better understand people, and will use some of the aspects from the methodology of ethnography (39). Ethnographic research focuses on the social aspect of the research object. Ethnography is a multidimensional research approach covering a range of qualitative methods, including interviews and observations. Gathering ethnographic data is often termed doing fieldwork, with the field referring to the specific sites or locations where the data collection takes places. Using an ethnographic approach to understand aspect of medication use after newly being discharged could provide new, important insights to the field, both in theory development and to inform applied research projects.

The ideation phase will comprise the following methods:
 For the development of the new intervention a design thinking framework will be used. The framework is a process that allows the researchers to see a product or a solution through the eyes of the end user. It is comprised of five steps where the first steps, empathy and define, represent the problem finding phase, and the last steps, ideate, prototype and test, represent the problem-solving phase. This is visualized in Figure 2.


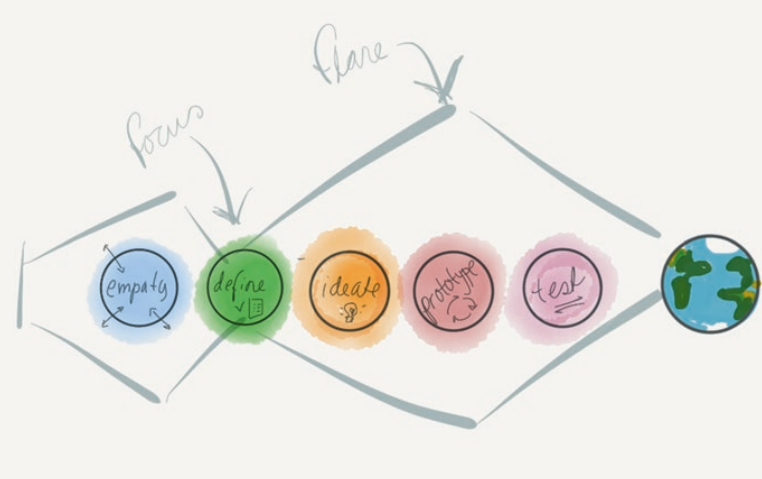


Figure 2: The design thinking process.

The ideation phase will lead into the implementation phase for further planning of the future intervention.

### **Study procedures**

#### Inspiration phase

- Literature search
  Before the inclusion starts, we will perform a literature search through relevant research in PubMed and Medline, using search terms such as “patient-centered care”, “person-centered care”, “decision-making”, “health communication”, “self-efficacy”, “medication management”, “medication instructions”, “patient participation”, “patient preference”, “patient transfer”, “personal health records”, “patient’s drug list” and “electronic patient record”. This to identify previously published models for an intervention.
- *Recruitment of study participants:*

Participants to the quantitative and qualitative parts will be recruited simultaneously. Patients admitted to the Internal medicines ward and Geriatric ward, Oslo University Hospital (OUS)(Moynihan, #48), Ullevål, and a selection of HCP and (if applicable) next of kin, will be included. Employees at the wards will ask inpatients for permission for one of the data collectors to inform and ask about participation in the study. This will take place close to the patients discharge (1-3 days ahead). Participants will be enrolled at the hospital, after they have given written, informed consent. Consent from patients and next of kin will be obtained for medication reconciliation and interviews by use of one consent form (attached). Consent will be obtained from HCP after their patient’s enrollment in the study (attached).

- *Study localization and –period:*

The data collection will take place face to face in the patient’s home, HCP offices or other suitable location (e.g. meeting room at the hospital), approximately 1-2 weeks after the patients hospital discharge for patients and next of kin, and after the patients discharge for HCP. A pilot study will be carried out during the spring 2022. The inclusion of patients, next of kin and HCP to the main study will start in the autumn 2022 and continue until the different parts have reach their goal, and for the qualitative parts; also have enough information power (40). The goal is to include patients, next of kin and HCP in the period from August 2022-July 2024. To further enrich the data, some patients might be selected for additional follow up interviews, after additional 3-4 weeks.

- *Inclusion criteria:*Patients: Adult ≥ 18 years who is admitted to the wards described above and gives written, informed consent to participate in the study. If the patient is not competent to consent, consent can be obtained from the patient’s next of kin. The patients should have residential address in Oslo (due to practical reasons), live at home and normally manage their medications themselves (might have help from homecare nurses or next of kin). The patients should be scheduled to be discharged from the wards to their home or to short-term stay in nursing homes. The patients should use at least four regular medications from at least two therapy classes (Anatomical Therapeutic Chemical (ATC) at first level (41)) at discharge (according to the discharge summary), as a proxy measure for multimorbidity. The patients should also have at least two chronic conditions.
  Next of kin: Expected to be involved in the included patient’s medication regime or management after hospital discharge. Able and willing to give written, informed consent to participate in the study.

  HCP: General practitioners (GPs) and homecare nurses with experience in medication management for multimorbid patients. Able and willing to give written, informed consent to participate in the study.
- *Exclusion criteria:*Patients who are terminal, isolated due to infections. Has previously been included in the study, has advanced cognitive failure, in accordance with assessment from treating physician, will not be discharged from the included wards to their homes (for example planned transfer to another ward or long-term stay at nursing home), or who are unable to communicate in Norwegian or English will be ineligible.

  HCP and next of kin: Persons unable to communicate in Norwegian or English. HCP or next of kin that has previously been included in the study.

  Advice will be obtained from physicians/nurses at the wards regarding for example patient’s cognitive function and where they will be discharged to, during both the pilot study and main study.
- *Number of persons to be included:***Quantitative study with medication reconciliation:** The data collection will continue consecutively until the goal of 150 patients is reached. If it is feasible, we will try to reach 200 patients. We think 150-200 patients will give good insight into different types of medication discrepancies, since studies have shown that up to 90% of patients have at least one medication discrepancy in primary care (7-9). The inclusion and medication reconciliation will be done by the PhD-student together with master students in pharmacy.

  **Qualitative semi-structured interviews with patients and next of kin:** The data collection will continue until we have enough information power (40). This means that a selection of patients from the quantitative study described above will be chosen purposively and step by step along the way to ensure the informational strength in the selection. When possible, we will include next of kin in the interviews together with the patient. We aim to include around 20-30 patients, without counting in next of kin. For the follow-up interviews, approximately 5-8 patients will be selected. The part will be accomplished together with the quantitative part. Every new interview will be compared with previous interviews to identify similarities and differences. Characteristics it is important to ensure variability for; women and men, different ethnicities, education type, spread in age, number of medications and help from next of kin/homecare nurses or not. It is also important to ensure variability in number and type of medications and diagnoses. The inclusion and interviews of patients will be done by the PhD-student and master students in pharmacy.

  **Qualitative semi-structured interviews with HCP:** The data collection will continue until we have enough information power (40). This means that HCP will be recruited purposively along the quantitative study to ensure the informational strength in the selection. We aim to include around 15-20 HCP. The HCP recruited are involved in the patients medication regime or management, this to ensure that they have knowledge about patients with multiple long term conditions. Every new interview will be compared with previous interviews to identify similarities and differences. Characteristics it is important to ensure variability for; woman and men, physicians and homecare nurses, spread in age, years of working experience, different ethnicities and number of medications the patients they care for use. The inclusion and interviews of HCP will be done by the PhD-student.
- *Training and piloting:*Medication reconciliation and interviews will be done by the PhD-student and master students in pharmacy after receiving adequate training of clinical work. Training in medication reconciliation will be performed in accordance with procedures from the Hospital Pharmacies Enterprise, South-Eastern Norway (attached), by an experienced clinical pharmacist (42). The procedure is based on the IMM-model for clinical pharmacists.

  Both the PhD-student and master students will receive training and supervision in interviewing methodology from a researcher in the project group with strong competence in qualitative methods. During the spring 2022, the PhD-student will complete a course in qualitative research methods at the University of Oslo (UiO). The master students will complete relevant research preparatory courses during spring 2022.

  The study procedures and documents will be piloted to obtain input to their finalization, e.g. the interview guide, and the practicability of the data collection tools. Inclusion of patients to the pilot will continue until sufficient feedback has been obtained. The inclusion to the pilot will follow the study criteria, as described above. If only minimal or no changes to the documents are deemed necessary, persons included to the pilot might be included in the study population described above. The pilot for all parts will start at the same time, and be finished when all details are in order. The PhD-student will have assistance from the research group for detailed design of the study during the pilot, and assistance as needed during the study. Consent to participate in the pilot study will be obtained as described above.
- *Pre-understanding*
  The PhD-student has a master in Pharmacy from 2021 within the field of clinical pharmacy and the master students are familiar with medications. The research group has been involved in design and planning of the study. The research group comprises pharmacist with experience in research within clinical and social pharmacy, as well as clinical experience, a professor in geriatrics, and nurse experienced in research and affiliated at the homecare services.
- *Instruments***Quantitative study with medication reconciliation:** The medication reconciliation will describe medication discrepancies between the medication list in the discharge summary and the actual medication use after hospital discharge. The medication discrepancies will be explored in conversation with the patient or, if the patient agrees to this, next of kin or other relevant information sources such as the GP or homecare nurse, to figure out why they have occurred. This could for example be changes done by the GP after hospital discharge. The medication reconciliation form from Hospital Pharmacies Enterprise, South-Eastern Norway (attached) will be used to do this task in accordance to their procedure for performing this (attached). The data will be analyzed consecutively to ensure that all details is included. A digital tool has been developed for the data collection in this study (attached). The medication discrepancies will retrospectively be assessed for which clinical relevance it would have for the patient in both a short-term and long-term perspective. This will be done by our research group in collaboration with a senior physician.

**Qualitative semi-structured interviews with patients and, if present, next of kin:** The interviews will focus on patients and next of kin perceptions regarding medication use, shared decision-making when it comes to medications and their opinions about previously published interventions. Open questions will primarily be used in the interviews adjusted to each individual patient to explore different patient perspectives. The interview guide will be divided into themes and contain some predefined overarching questions with examples of possible probing questions. Furthermore, field notes will be taken to describe the setting, issues observed with relevance to the administration of medications, persons present and time consumption for the interviews. The interviews with patients and next of kin will focus on the following:

- How the patient experience being a medication user, what they think work and what they think do not work. If something could be done to make medication use a more pleasant (rather than coercive) experience
- How they use and assesses the utility value of digital solutions
- Experienced factors of PCC during the hospital stay, at discharge and after discharge, with a view to medication treatment
- Their opinions about previously published interventions with examples

The interviews will be audiotaped, when the patients and (if present) next of kin agrees to this. If the patient does not consent to recording, notes will be taken. The interviewers will transcribe consecutively to prevent memory-bias (43), and to ensure that all details and own reflections comes with. The interviewers will read each other’s transcripts and meet regularly to ensure the quality of the interviews. Follow-up interviews will be informal in nature, with no specific pre-defined interview guide.

**Qualitative semi-structured interviews with HCP:**
The interviews will focus on HCP’s perceptions regarding factors, barriers and facilitators in the care for patients with multiple long term conditions with importance for a new, improved intervention. Open questions will primarily be used in the interviews adjusted to explore different perspectives. The interview guide will be divided into themes and contain some predefined overarching questions with examples of possible probing questions. Furthermore, field notes will be taken to describe the setting and time consumption for the interviews.

The interviews with HCP will focus on the following:

- Factors in patients with multiple long term conditions medication treatment important for the patient’s self-efficacy as a user of medicines and for their quality of life, both in a negative and positive direction, e.g. experience with patient empowerment and PCC
- How the system could improve with focus on digital solutions
- Their opinions about previously published interventions with examples

The interviews will be audiotaped, when the HCP agrees to this. If the HCP does not consent, notes will be taken. The PhD-student will transcribe consecutively to prevent memory-bias (43), and to ensure that all details and own reflections comes with. The PhD-student will get help from the research group to read the transcripts and meet regularly to brief and discuss to ensure the quality of the interviews.

The main study for all parts will start at the same time, but the qualitative studies could be finished earlier if we reach the goal of patients or HCP earlier than the goal in the quantitative study.

- *Data and measurement variables:*Demographic data and measurement variables will be retrieved from electronic patient record or directly from the patients and next of kin. Following data will be registered as part of inclusion about patients:
- Age
- Gender
- District in Oslo
- Profession
- Country of origin (if not Norwegian)
- Reason for admission
- Date for admission at the ward
- Multidose before admission (yes/no)
- Acute or elective admission
- Education level
- Cognitive function (if separate form has been filled in at the wards)
- Frailty scale (if separate form has been filled in at the wards)
- Assistance with medication administration before admission (manage themselves, manage themselves with help from next of kin or manage themselves with help from homecare nurses)

The following data will be collected as part of inclusion or interview about next of kin:

- Age
- Gender
- What kind of assistance they give
- Education level
- Profession
- Relation to the patient
- How long they have assisted the patient

The following data will be collected as part of inclusion or interview about HCP:

- Profession
- Age
- Gender
- Country of origin (if not Norwegian)
- Education level
- Years of working experience
- Years of working experience with patients with multiple long term conditions

For patients, next of kin or HCP who do not consent to participate in the study, gender, age, role (patient, next of kin, HCP) and reason for refusal will be registered.

The following data will be collected consecutively after inclusion or at discharge for the patients:

- Type of ward they are discharged from
- Patients discharge summary
- Date of discharge
- Discharged to which care-level
- Medication list in the discharge summary: number of medications, ATC-code (level 5), medication name, dosage, formulation, regular/on demand use
- Diagnoses according to ICD-10: Number and type, as described in the patients discharge summary
- Multidose after discharge (yes/no)
- Assistance with medication administration after discharge (manage themselves, manage themselves with help from next of kin or manage themselves with help from homecare nurses).

The following data will be collected during medication reconciliation:

- Complete medication use after discharge: In this way, we will be able to count how many patients who has medication discrepancies and how many medication discrepancies each individual patients have. Why (if any) medication discrepancies have occurred.
- If they have assistance with medication administration: How much/type of help they have
- Descriptive data: Date, description of the setting, issues observed with relevance to the administration of medications, persons present and time consumption and information sources used during medication reconciliation.

Field work journal, field notes and other documents:
As part of the data collection process a fieldwork journal will be written by the data collectors. Here a narrative of the research process will be written down and form a basis for reflecting on the process and as inspiration for the data analysis (44). In addition, field notes will be written e.g. include impressions from the interviews, different kinds of observations done during the interviews, notes from the interviews. Information will also be collected from relevant documents, e.g. procedures from hospital and primary healthcare services.

- *Analyses:*Quantitative study: Medication reconciliation. Medication discrepancies revealed during medication reconciliation will be classified quantitatively, i.e. the proportion of patients with medication discrepancies, number of medication discrepancies per patient and type of medication discrepancies. In addition, the medication discrepancies will be categorized according to reasons why they have occurred. The clinical relevance will be classified quantitatively.

  Qualitative interviews and fieldwork. During the whole data collection process, field notes and fieldwork journal will be written by the data collectors. The interviews will be audiotaped, and will then be transcribed word for word. The interviews together with the field notes and journal will be analyzed inductively with inspiration from “content analysis” and/or systematic text condensation (45). The interviewers cooperate in the analyses to ensure quality, which means that the context is understood. Here also the field notes will be important in assuring reflectiveness of the process. Furthermore, the analyzes will focus on creating personas and scenarios for the ideation phase according to the design-thinking framework (37).

#### **Ideation phase**

Part 1: Empathize and define

As described, the inspiration phase is an important part of the process to understand a problem. The semi-structured interviews, field notes and qualitative analysis of the experiences from the eyes of patients, next of kin, GP’s and homecare nurses will provide the researchers with information about where and when the problems are manifesting themselves.

The next step is to structure the findings to arrive at some similar insights about the problems and situations for the participants. This will be achieved by comprising an empathy map where the research team will discuss both the actions and statements of the participants. The interpretations will aid the researchers to discover and reveal issues that were first not thought of when starting out.

Based on the understanding from the empathy phase we will create personas representing the patients and scenarios that can potentially lead to medication management problems and challenge the patients’ self-efficacy. Similar challenges and user experience will be merged to create several personas for the whole study population, as to not create many different personas based on each study participant. The persona is planned to be based on users with similar problems to emphasize the issues the majority of our study population is experiencing.

Part 2: Problem solving

Problem solving is dependent on creating an ideal situation for new ideas to emerge during the creative process. We will create teams that are as diverse as possible from the main researcher and will include among others: patients, GP’s, homecare nurses and pharmacists. The teams will be invited to participate in ideation and prototyping workshops. The previously described personas will be introduced into the workshops and several design thinking methods will be applied to spark innovation: brainstorming, “How might we”-questions, organizing ideas by relevance etc.

Part 3: Prototyping and testing

The findings from the inspiration phase together with the output of the prototyping workshops will be used by the research team to create prototypes of various tools. We expect to create 3-4 prototypes. The prototypes will be tested in two phases. The first phase will involve patient user representatives (N=) who will test the prototypes so the research team can receive feedback, as prototyping is an iterative process. The second phase will involve patients in hospital (n=12). Additionally we will carry out interviews with stakeholders such as patient user representatives, hospital physicians, GPs, nurses, pharmacists, next of kin and stakeholders from the Norwegian health authorities (n=50). The patients and other end users will be included after written, informed consent, see attachments. The same applies for HCPs and next of kin. The patients will be included from the hospitals in the South-Eastern Norway Regional Health Authority. The attending physician determines whether the patients are competent to consent in those cases where there is doubt about this. Feedback will be collected by using short interviews that will discuss design, usability, and satisfaction that end-users experience. The testing process and the interviews will be filmed and/or audiotaped. All collected data will be treated confidentially and stored on the research server of UiO, Services for sensitive data (TSD).

## **Ethics**

The hypothesis of the project is that knowledge about medication discrepancies and perceptions from patients, next of kin and HCP after discharge can contribute to a better success rate for the new and improved intervention (29). Before the participants are included in the study, they will receive written information about the project and can decide for themselves whether they want to participate or not. It has been taken into account that some patients might refuse to participate, as they might not want to be visited by the study pharmacists, or that some might withdraw their consent. It will be acceptable that patients consent only to participate in the part with medication reconciliation, this can help to achieve our goal for this part of the study. Participants will be offered a small gift at maximum value of 100 NOK, which is considered to small to influence their willingness to participate.

Information transfer when changing treatment level is a well known area of risk, and there is a need for greater focus on and knowledge about risk factors for medication discrepancies and perceptions of both patients, next of kin and HCP. The aim of the project is to form a basis for an improved intervention, which follows patients with multiple long term conditions during the hospital stay and through transition to the primary healthcare. This will be done by investigating medication discrepancies and map perceptions of patients, next of kin and HCP which, in both a positive and negative sense, are important for achieving seamless and person centered medication treatment, after the patients are discharged from hospital. It is expected that the results could give increased understanding that could contribute to a more seamless and person centered medication treatment in the future intervention and further development and improvement of healthcare services for patients.

Pharmacy students or the PhD-student, who are not affiliated with the internal medicines or geriatric wards on a daily basis, will perform the medication reconciliation, interviews and writing field notes. The pharmacy students and PhD-student are not involved in or have an overview of the overall picture and assessments behind decisions made regarding medication treatment. The pharmacy students and PhD-student have no active role in the treatment team and participation in the study thus does not contribute to any risk or harm for the participants beyond the time they spend on the medication reconciliation, interviews and/or workshop. No invasive procedures will be performed. If the medication reconciliation or interviews of the patients reveal critical discrepancies in the medication management in the patient’s home, this will be passed on to the homecare nurse or GP.

*Privacy and information:*The patients will be included after written, informed consent, see attachments. The same applies for HCP and next of kin. The attending physician determines whether the patients are competent to consent in those cases where there is doubt about this. After consent is obtained, the patient, next of kin or HCP will be given a study number. The included participants can at any time withdraw their consent, without having to give any justification for this. Registered data will be deleted if consent is withdrawn, as long as the data not yet has been included in the analysis work. Participants will receive a copy of the consent form. The signed consent forms will be kept in a locked filing cabinet in the project manager’s office at UiO, and separate from the collected study data. The code list that connects patient identity to study number will be stored separately and secured from other data. The code list will be deleted no later than 10.01.2027.

All collected data will be treated confidentially and stored on the research server of UiO, Services for sensitive data (TSD). Data from medication reconciliation will be collected using a self-developed web form and stored directly on TSD. The interviews will be recorded on a Dictaphone and the audio files will be uploaded to TSD, immediately after the interview has ended. The interviews will be transcribed on TSD. The audio file will be deleted after the interview has been analyzed. Deidentified electronic research data will be processed using SPSS (quantitative data) or using Nvivo (qualitative data), on TSD.

Approval of the research project will be sought from the Regional Ethics Committee (REK). In accordance with procedures for research at UiO, notification will also be sent to the Norwegian Center for Research Data (NSD).

## **Project timeline**

| **Activity** | **Date** |
| --- | --- |
| Complete protocol included consent form | 10.01.2022 |
| Submission of application to REK | 10.01.2022 |
| Submission of application to NSD | 31.01.2022 |
| Enter a collaboration agreement with OUS for recruitment of patients/next of kin into the study | 31.01.2022 |
| Enter a data processor agreement for storage on TSD | 31.01.2022 |
| Research preparation courses and training for PhD-student | Spring 2022 |
| Piloting | Spring 2022 |
| Research preparation courses and training for master students | August 2022 |
| Inclusion period for the project | May 2022-Spring 2024 |
| Submission of master thesis (two planned) | May 2023 |
| Research preparation courses and training for master students | August 2023 |
| Submisson of Paper 1 (three planned) for publishing* | Autumn 2023 |
| Submission of Paper 2 for publishing | Spring 2024 |
| Submission of master thesis (two planned) | May 2024 |
| Submission of Paper 3 for publishing | Autumn 2024 |
| Compilation of PhD thesis | Autumn 2024-Spring 2025 |
| Complete and submission of PhD thesis Defend thesis | Spring 2025 |

*The results from the qualitative parts are expected to reach saturation and have enough information power earlier than the goal of patients in the quantitative part.

In periods with droplet infection at the wards, the inclusion will go slower. Progress in the inclusion will be reported on a weekly basis to the supervisor.

## **Budget**

This project is financed by the University of Oslo.

## **References**

1. Marengoni A, Angleman S, Melis R, Mangialasche F, Karp A, Garmen A, et al. Aging with multimorbidity: A systematic review of the literature. Ageing Res Rev. 2011;10(4):430-9.

2. Vetrano DL, Calderón-Larrañaga A, Marengoni A, Onder G, Bauer JM, Cesari M, et al. An International Perspective on Chronic Multimorbidity: Approaching the Elephant in the Room. J Gerontol A Biol Sci Med Sci. 2018;73(10):1350-6.

3. Mercer SW, Salisbury C, Fortin M. ABC of multimorbidity. Chichester: Wiley; 2014.

4. Scullin C, Scott MG, Hogg A, McElnay JC. An innovative approach to integrated medicines management. J Eval Clin Pract. 2007;13(5):781-8.

5. Midlöv P, Deierborg E, Holmdahl L, Höglund P, Eriksson T. Clinical outcomes from the use of Medication Report when elderly patients are discharged from hospital. Pharm World Sci. 2008;30(6):840-5.

6. Bishop MA, Cohen BA, Billings LK, Thomas EV. Reducing errors through discharge medication reconciliation by pharmacy services. Am J Health Syst Pharm. 2015;72(17 Suppl 2):S120-S6.

7. Tiihonen M, Nykänen I, Ahonen R, Hartikainen S. Discrepancies between in-home interviews and electronic medical records on regularly used drugs among home care clients: Discrepancies Between In-home Interviews and EMR. Pharmacoepidemiology and drug safety. 2016;25(1):100-5.

8. Wekre LJ, Spigset O, Sletvold O, Sund JK, Grimsmo A. Multidose drug dispensing and discrepancies between medication records. Qual Saf Health Care. 2010;19(5):e42-e.

9. Jensen SA, Øien T, Jacobsen G, Johnsen R. Erroneous drug charts--a health hazard? Tidsskr Nor Laegeforen. 2003;123(24):3598-9.

10. Josendal AV, Bergmo TS, Granas AG. Implementation of a shared medication list in primary care – a controlled pre-post study of medication discrepancies. BMC Health Services Research. 2021;21(1):1335.

11. Doyle C, Lennox L, Bell D. A systematic review of evidence on the links between patient experience and clinical safety and effectiveness. BMJ Open. 2013;3(1):e001570.

12. Lov om pasient- og brukerrettigheter (pasient- og brukerrettighetsloven) Lovdata1999 [updated 01.07.202126.11.2021].

13. Kogan AC, Wilber K, Mosqueda L. Person-Centered Care for Older Adults with Chronic Conditions and Functional Impairment: A Systematic Literature Review. J Am Geriatr Soc. 2016;64(1):e1-e7.

14. Kane PM, Murtagh FEM, Ryan K, Mahon NG, McAdam B, McQuillan R, et al. The gap between policy and practice: a systematic review of patient-centred care interventions in chronic heart failure. Heart Fail Rev. 2015;20(6):673-87.

15. van den Akker M, Buntinx F, Knottnerus JA. Comorbidity or multimorbidity: what's in a name? A review of literature. The European journal of general practice. 1996;2(2):65-70.

16. Nguyen H, Manolova G, Daskalopoulou C, Vitoratou S, Prince M, Prina AM. Prevalence of multimorbidity in community settings: A systematic review and meta-analysis of observational studies. J Comorb. 2019;9:2235042X19870934-2235042X.

17. Andersen AH, Wekre LJ, Sund JK, Major A-LS, Fredriksen G. Evaluation of implementation of clinical pharmacy services in Central Norway. European journal of hospital pharmacy Science and practice. 2014;21(2):125-8.

18. Shah C, Hough J, Jani Y. Medicines reconciliation in primary care: a study evaluating the quality of medication-related information provided on discharge from secondary care. Eur J Hosp Pharm. 2020;27(3):137-42.

19. Al-Sayad A. Innføring av prosedyre for legemiddelsamstemming ser ikke ut til å redusere uoverensstemmelser i legemiddellistene i Helse Nord HF: UiT; 2016.

20. Varkey P, Cunningham J, O'Meara J, Bonacci R, Desai N, Sheeler R. Multidisciplinary approach to inpatient medication reconciliation in an academic setting. Am J Health Syst Pharm. 2007;64(8):850-4.

21. Al-Rashoud I, Al-Ammari M, Al-Jadhey H, Alkatheri A, Poff G, Aldebasi T, et al. Medication discrepancies identified during medication reconciliation among medical patients at a tertiary care hospital. Saudi Pharm J. 2017;25(7):1082-5.

22. Kaboli PJ, Hoth AB, McClimon BJ, Schnipper JL. Clinical Pharmacists and Inpatient Medical Care: A Systematic Review. Arch Intern Med. 2006;166(9):955-64.

23. Grover S, Fitzpatrick A, Azim FT, Ariza-Vega P, Bellwood P, Burns J, et al. Defining and Implementing Patient-Centered Care: An Umbrella Review. ScienceDirect. 2021.

24. Kitson A, Marshall A, Bassett K, Zeitz K. What are the core elements of patient-centred care? A narrative review and synthesis of the literature from health policy, medicine and nursing. J Adv Nurs. 2013;69(1):4-15.

25. Bandura A. Self-efficacy: Toward a unifying theory of behavioral change. Psychological review. 1977;84(2):191-215.

26. Kusch MKP, Haefeli WE, Seidling HM. How to meet patients’ individual needs for drug information-A scoping review. Patient Prefer Adherence. 2018;12:2339-55.

27. Fylan B, Armitage G, Naylor D, Blenkinsopp A. A qualitative study of patient involvement in medicines management after hospital discharge: an under-recognised source of systems resilience. BMJ Qual Saf. 2018;27(7):539-46.

28. Ensing HT, Stuijt CCM, Van Den Bemt BJF, Van Dooren AA, Karapinar-Çarkit F, Koster ES, et al. Identifying the optimal role for pharmacists in care transitions: A systematic review. Journal of managed care pharmacy. 2015;21(8):614-38.

29. Kempen TGH. Medication reviews by clinical pharmacists in older hospitalised patients: Implementation, performance and effects2021.

30. Lea M, Mowé M, Molden E, Kvernrød K, Skovlund E, Mathiesen L. Effect of medicines management versus standard care on readmissions in multimorbid patients: A randomised controlled trial. BMJ Open. 2020;10(12):e041558-e.

31. Rognan SE, Kälvemark Sporrong S, Bengtsson K, Lie HB, Andersson Y, Mowé M, et al. Discharge processes and medicines communication from the patient perspective: A qualitative study at an internal medicines ward in Norway. Health Expect. 2021;24(3):892-904.

32. Rognan SE, Kälvemark-Sporrong S, Bengtsson KR, Lie HB, Andersson Y, Mowé M, et al. Empowering the patient? Medication communication during hospital discharge: a qualitative study at an internal medicines ward in Norway. BMJ open. 2021;11(6):e044850-e.

33. Hugtenburg JG, Timmers L, Elders PJM, Vervloet M, van Dijk L. Definitions, variants, and causes of nonadherence with medication: a challenge for tailored interventions. Patient Prefer Adherence. 2013;7:675-82.

34. Scullin C, Hogg A, Luo R, Scott MG, McElnay JC. Integrated medicines management - can routine implementation improve quality? J Eval Clin Pract. 2012;18(4):807-15.

35. Hellström LM, Bondesson Å, Höglund P, Midlöv P, Holmdahl L, Rickhag E, et al. Impact of the Lund Integrated Medicines Management (LIMM) model on medication appropriateness and drug-related hospital revisits. Eur J Clin Pharmacol. 2011;67(7):741-52.

36. Craig P, Dieppe P, Macintyre S, Michie S, Nazareth I, Petticrew M. Developing and evaluating complex interventions: the new Medical Research Council guidance. BMJ. 2008;337(7676):29,1561,290,281,570,295,230,132,231,694,133,215,652,2600,455,1235,257,676,476,379,413,10,118,98,472,282,2,80,349,549,40,806-983.

37. IDEO. The Field Guide to Human-Centred Design. 1st ed2015.

38. Hahn-Goldberg S, Chaput A, Rosenberg-Yunger Z, Lunsky Y, Okrainec K, Guilcher S, et al. Tool development to improve medication information transfer to patients during transitions of care: A participatory action research and design thinking methodology approach. Research in social and administrative pharmacy. 2022;18(1):2170-7.

39. Lau SR, Kaae S, Sporrong SK. Ethnography and its potential for studying the social in social pharmacy: An example of autonomy and pharmaceuticals in eldercare. Res Social Adm Pharm. 2022;18(1):2151-6.

40. Malterud K, Siersma VD, Guassora AD. Sample Size in Qualitative Interview Studies: Guided by Information Power. Qual Health Res. 2016;26(13):1753-60.

41. ATC index with DDDs. Collaborating centre for drug statistics methodology: World Health Organization; [updated 17.12.2020. Available from: <https://www.whocc.no/atc_ddd_index/>.

42. Prosedyre for legemiddelsamstemming. Sykehusapotekene HF, internt dokument.

43. Vitaud L. How your memory plays tricks on you | We're all biased 2019 [19.12.2021]. Available from: <https://www.welcometothejungle.com/en/articles/bias-memory>.

44. Hammersley M, Atkinson P. Ethnography : principles in practice. 3rd ed. ed. London: Routledge; 2007.

45. Malterud K. Kvalitative metoder i medisinsk forskning - en innføring. Oslo: Universitetsforlaget; 2011.

## **Attachments**

Medication reconciliation: procedure and checklist.

CV for projectleader

Consent template patients and next of kin

Consent template HCP

Interview guide for patients and next of kin

Interview guide for HCP

Web form for medication reconciliation
